# Supplementary material for: Transcriptomic Exploration Combined With Experimental Validation: Uncovering The Potential Value Of Ammonia Death-Related Biomarkers In Hepatic Ischemia-Reperfusion Injury
Source: Research Square preprint supplement (doi:10.21203/rs.3.rs-7000864/v1), 2025-07-29
Supplement: Supplementary file 3 [file 10287ae0b5e1ee383e173918.xlsx]

## Sheet: Sheet1
LCK
CST7
STAT1
FASLG
HLA-DRB5
GZMK
ETV7
WARS1
CCL4
TRBV29-1
PYHIN1
CCL4L2
CD8A
CD7
LINC02446
FBXO6
HLA-C
CXCR2P1
TRIM69
OR211P
PSMB8-AS1
SH2D2A
ITK
CXCL11
CXCR6
CD27
SPN
SLA2
GNLY
CD74
HLA-DMA
LINC02195
HLA-F
HCP5
CD2
LAP3
IRF1
HLA-DMB
UBE2L6
GZMB
PSME2
GZMH
CD6
CD8B
LINC01871
LAG3
HLA-B
SIRPG
GPR171
SH2D1A
PSME2P2
GZMA
APOC1
DBH-AS1
AC026369.3
TRBV8
ZAP70
MAP4K1
SEPTIN1
HLA-A
APOL6
TRAV19
PDCD1
SLAMF6
CD3G
PSMB8
CD3E
CCL5
GZMM
TRDC
ZNF683
HLA-DRB1
TRGC2
CIITA
ITGAL
TRBV28
PSMB9
CXCL9
HLA-DPB1
SLAMF7
CXCL10
HLA-DQB1
CD3D
GBP1
TRAC
APOL3
HLA-DRA
TAP1
PRF1
TRBV27
SIT1
TRBV7-9
IFNG
HLA-DQA1
CXCR3
BTN3A3
NKG7
IL12RB1
IL2RB
HLA-E
CCR5
TIGIT
TAF5LP1
IL2RG
GBP5
GBP4
TRBC1
BATF2
NLRC5
CALHM6
IDO1
HLA-DOA
CTLA4
CXCL13
TRBD1
B2M
TBC1D10C
PSME1
GLS
RHCG
ATP6AP2
TCIRG1
CLN3
CLN5
LRRK2
TMEM199
SNAPIN
TMEM9
GRN
LAMP1
LAMP2
RNASEK
OCA2
SLC45A2
ATP6V1D
ATP6V1H
ATP6V1A
ATP6V0C
ATP6V0B
ATP6V0A1
ATP6AP1
TMEM106B
CLN6
PPT1
TMEM165
VPS33A
TASL
SPNS1
TMEM175
CCDC115
CREG1
ATP6V1F
HDAC6
ADAMTS13
CNR2
COMT
ADORA2A
CPS1
DBH
NQO1
TRDMT1
DRD1
DRD2
DRD4
DRD5
EDN1
EDNRA
FOSB
RGS17
GLDC
GRIA1
GRIN2A
HDAC2
NR4A1
HPRT1
ITGA2
JAK2
KCNC1
KCNC2
ASIC1
ASS1
MYD88
NR4A2
OXT
OXTR
RRM2B
PDE1B
PITX3
PPP3CA
RANBP2
RGS2
RGS4
RGS7
SLC1A1
SLC18A2
TH
UROS
CAD
PPP1R1B
PPP1R9B
RGS20
RGS9
HDAC9
CDK1
FTCD
SDS
SDSL
HAL
SRR
GATC
ASNS
GATB
PFAS
ASNSD1
NADSYN1
QRSL1
GMPS
ADSL
ASL
CHAC2
PAM
APMAP
GGCT
CHAC1
GGACT
ADA
GNPDA1
RIDA
ADAR
ADARB1
ADARB2
APOBEC2
ADAT3
ADAD1
GNPDA2
ADAT2
APOBEC3D
LACC1
ADAL
ADAD2
DCTD
APOBEC3H
APOBEC3A
APOBEC3F
ADAT1
AMPD1
AMPD2
AMPD3
APOBEC3C
APOBEC1
ADA2
AICDA
APOBEC3G
ZBP1
CDADC1
APOBEC3B
GDA
CDA
PRG3
BTBD9
TPH2
ENPP6
DDC
ALDH2
SLC29A4
SLC44A1
RNF180
DMGDH
HDC
HNMT
HTR1A
ALDH7A1
ATP7A
CHDH
BCHE
SLC22A3
SRD5A1
TPH1
TRH
SLC12A7
AQP8
AQP1
RHBG
SLC12A5
RHAG
RHCE
RHD
HCN2
SLC12A2
SLC12A4
SLC12A6
SLC6A14
SLC25A29
SLC16A9
PDZK1
SLC38A2
SLC6A20
SLC22A15
SLC25A19
SLC6A12
SLC22A1
SLC22A2
SLC22A4
SLC22A5
SLC25A20
SLC44A4
SLC22A16
SLC7A6
ADSS2
RASGRP1
CETP
ILVBL
CHRNA2
CHRNB2
APOA5
GPR119
ABCA1
ESYT1
PITPNB
HACL1
CHMP2A
GPR12
APOA2
APOA4
IGHM
JCHAIN
NF1
OGDH
SERPINA5
PCYT1A
CHMP3
PITPNA
PLTP
DHTKD1
OGDHL
ESYT2
PITPNM2
PCTP
RPE65
TKT
VDAC1
VDAC2
TKTL1
ESYT3
TKTL2
SESTD1
PCYT1B
SCARB2
PITPNM1
ATG5
FUNDC1
CSNK2A2
VDAC3
TOMM22
CSNK2A1
MAP1LC3A
UBE2D3
MFN2
OPTN
TOMM40
UBE2D2
MAP1LC3B
RPS27A
ATG12
UBC
TOMM70
MTERF3
PINK1
SQSTM1
UBB
MFN1
TOMM20
TOMM5
ULK1
UBE2N
TBK1
PRKN
UBE2L3
TOMM7
SRC
ATG9A
CSNK2B
TOMM6
UBA52
UBE2V1
PGAM5
TOM1
TRIM13
CALCOCO2
STUB1
NOD1
KAT5
SPTLC1
CERS1
PIM2
WDR45
SNX18
ZDHHC19
SMCR8
SESN3
ADRB2
DCN
C9orf72
RAB3GAP1
TRIM32
ATG2A
LARP1
UFL1
SIRT1
RAB3GAP2
FBXO7
GPSM1
HSPB8
EIF2AK1
SESN1
GNAI3
RUFY4
SLC25A4
SLC25A5
HTT
HIF1A
HMOX1
STING1
IRGM
IL4
KDR
SNX30
PAFAH1B2
SH3GLB1
WAC
SNX7
PIP4K2A
WIPI1
RNF31
VPS13D
AMBRA1
PRKAA2
MAPK3
ELAPOR1
RALB
SCOC
MOAP1
NOD2
DDRGK1
BNIP3
BNIP3L
SUPT5H
MAP3K7
TSC2
UBE2A
UVRAG
FYCO1
EPM2A
PIP4K2C
CDK5RAP3
SESN2
PIP4K2B
WDR24
IKBKG
BECN1
SNX4
RIPK2
LACRT
LRSAM1
SPTLC2
BAG3
DELE1
